# Supplementary material for: Facile Synthesis of Quinolinecarboxylic Acid–Linked Covalent Organic Framework via One–Pot Reaction for Highly Efficient Removal of Water–Soluble Pollutants
Source: Molecules. 2023 Apr 27;28(9):3752. doi: 10.3390/molecules28093752 (PMC10179942; doi:10.3390/molecules28093752)
Supplement: Supplementary file 1 [file molecules-28-03752-s001.zip › molecules-2376368-supplementary.pdf]

## Supplementary Materials

### Methods

**Characterization.** Scanning electron microscope (SEM) images were recorded on a SWPRATM55 scanning electron microscope (Carl Zeiss, AG, Aalen, Germany). The FT-IR data were obtained ranging from 500 to 3700  $\text{cm}^{-1}$  on a Nicolet 710 spectrometer (California, USA). The  $\text{N}_2$  adsorption-desorption experiments were performed on a Kubo-X1000 analyzer (Bjbuilder, Beijing, China). The Brunauer–Emmett–Teller (BET) method was applied to calculate the surface area and pore volume. The pore size distribution was calculated with the Barrett–Joyner–Halenda model. Thermogravimetric (TG) analysis was performed from room temperature to 850 °C on the STA 449F3-QMS403C system (Netzsch, Germany). The X-ray photoelectron spectroscopy (XPS) was conducted using an ESCALAB 250XI imaging electron spectrometer (Thermo, Waltham, MA, USA). A Vario EL III analyzer (Elementar, Germany) was used to perform the elemental analysis.

The liquid-state NMR was recorded on an Avance III HD 400 MHz spectrometer (Bruker Biospin AG, Switzerland) using tetramethylsilane (TMS) as an internal standard. Chemical shifts were reported in ppm.  $^1\text{H}$  NMR spectra were referenced to DMSO- $d_6$  (2.50 ppm), and  $^{13}\text{C}$ -NMR spectra were referenced to DMSO- $d_6$  (39.5 ppm). All  $^{13}\text{C}$  NMR spectra were measured with complete proton decoupling. The solid-state  $^{13}\text{C}$  NMR spectra were measured on a JNM-ECZ600R NMR spectrometer (JEOL, Japan). Contaminants were analyzed using the Waters ACQUITY UHPLC system coupled to a Waters Xevo TQ-XS triple quadrupole mass spectrometer (Milford, USA).

**The conditions of UHPLC-MS/MS.** The analysis of four contaminants was performed using a Waters Acquity UPLC coupled with Waters Xevo TQ-XS (Milford, USA). The separations were obtained using a Waters Acquity UPLC BEH C18 column (1.7  $\mu\text{m}$ , 2.1  $\times$  50 mm) with the mobile phase as listed in Table S4 and Table S3 pumped at a flow rate of 0.3 mL/min. The temperature of auto sampler and column were 10 °C and 40 °C, respectively. The injection volume was 5  $\mu\text{L}$ .

The mass spectrometry experiment was working with ESI mode under the multiple reaction monitoring (MRM) conditions. The MRM details are listed in Table S5. The ESI source parameters were: capillary voltage, 0.5 kV; source temperature, 150 °C; desolvation temperature, 400 °C; desolvation gas, 800 L h<sup>-1</sup>; desolvation gas, 99.99% purity of N<sub>2</sub>; nebulization flow, 7.0 Bar.

The linear ranges and limits of quantification (LOQs) for the determination of four contaminants by UHPLC-MS/MS are listed in Table S6.

**The synthesis of quinoline-4-carboxylic acid.** A mixture of pyruvic acid (106 mg, 1.2 mmol), aniline (102 mg, 1.1 mmol), and benzaldehyde (106 mg, 1.0 mmol) in 1,4-dioxane/*n*-butanol solution (5 mL, *v/v* = 1:4) was well stirred with NH<sub>2</sub>SO<sub>3</sub>H (3 mg, 3 mol%). This mixture was magnetically stirred under 100 °C for 4h. Then, the reaction mixture was cooled to room temperature and concentrated to dryness in *vacuo*. The residue was recrystallized using ethanol to obtain quinoline-4-carboxylic acid as white solid (189 mg, 76%). <sup>1</sup>H NMR (400 MHz, d<sub>6</sub>-DMSO): δ 14.03 (s, 1H), 8.69 (d, 1H, *J* = 8.0 Hz), 8.49 (s, 1H), 8.32 (d, 1H, *J* = 8.0 Hz), 8.19 (d, 2H, *J* = 8.0 Hz), 7.88 (t, 1H, *J* = 8.0 Hz), 7.73 (t, 1H, *J* = 7.2 Hz), 7.53-7.63 (m, 3H).

**Isothermal adsorption.** The working solutions (10–200 µg/mL) for 2,4-D, MB, RhB, and gentamicin were prepared. QCA-COF (10 mg) was added to each solution (20.0 mL). The mixture was shaken for 45 min at 25 °C. After adsorbing, the free concentration of 2,4-D, MB, RhB, and gentamicin was measured by UHPLC-MS/MS. The quantity (*Q<sub>e</sub>*, mg/g) of adsorbed to QCA-COF was calculated by the following equation (1):

$$Q_e = (C_o - C_e) v / m \quad (1)$$

where *C<sub>o</sub>* (µg/mL) is the initial concentration, *C<sub>e</sub>* (µg/mL) is the equilibrium concentration, *v* (mL) is the volume of water sample, and *m* (mg) is the mass of QCA-COF.

The adsorption data are described by Freundlich equation (2) and Langmuir equation (3) as following:

$$\ln Q_e = \ln C_e / n + \ln K_F \quad (2)$$

$$C_e / Q_e = 1 / Q_m K_L + C_e / Q_m \quad (3)$$

For Freundlich equation,  $n$  is the indicator of adsorption intensity, while  $K_F$  is the indicator of adsorption capacity. According to the Freundlich theory, it is favorable adsorption when  $n > 1$ . For Langmuir equation,  $Q_m$  is the theoretical maximum adsorption capacity.

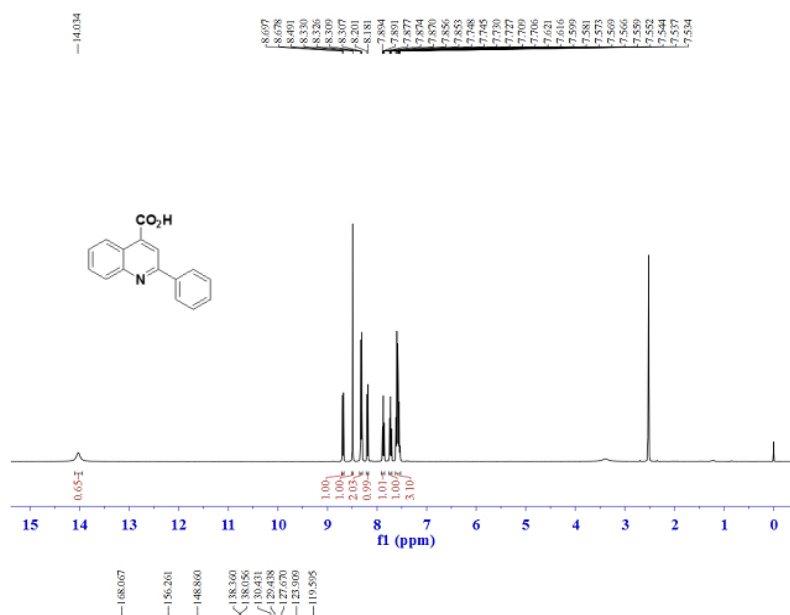

Figure S1. <sup>1</sup>H NMR spectrum of model compound.

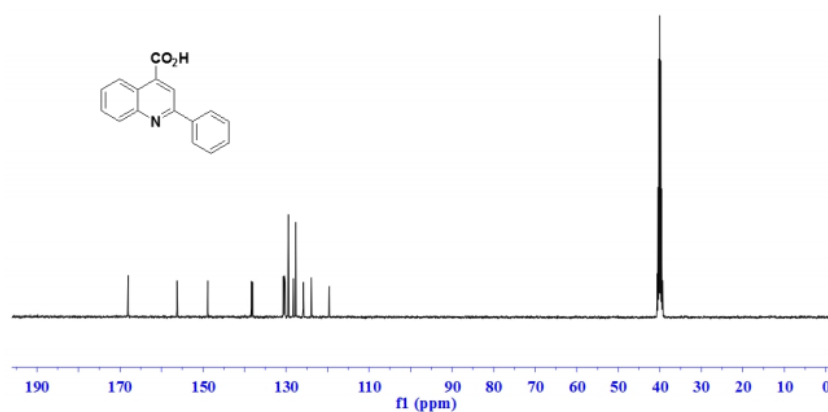

Figure S2. <sup>13</sup>C NMR spectrum of model compound.

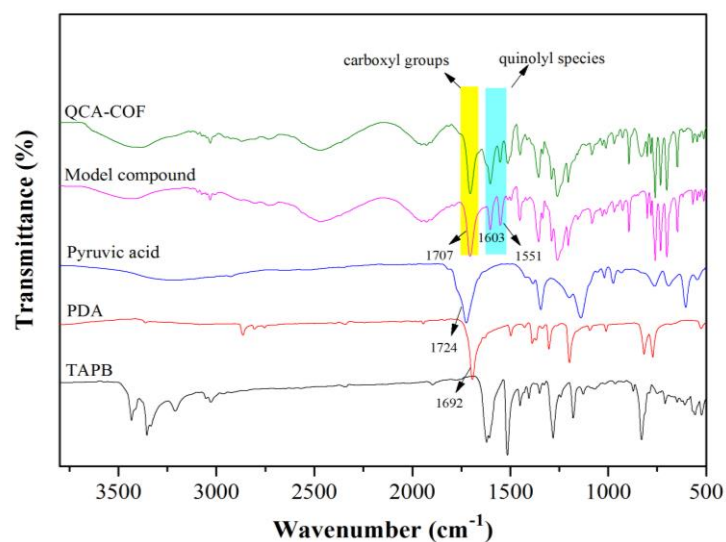

Figure S3. FT-IR spectra of TAPB, PDA, pyruvic acid, model compound, and QCA-COF.

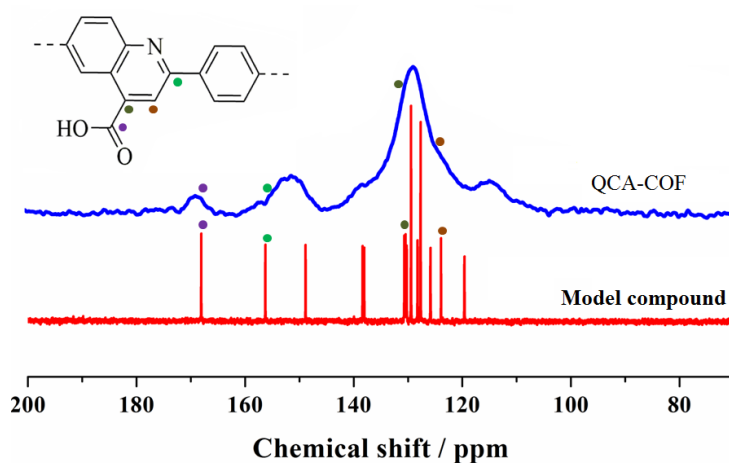

Figure S4. Liquid-state  $^{13}\text{C}$  NMR spectrum of model compound and solid-state  $^{13}\text{C}$  NMR spectra of QCA-COF.

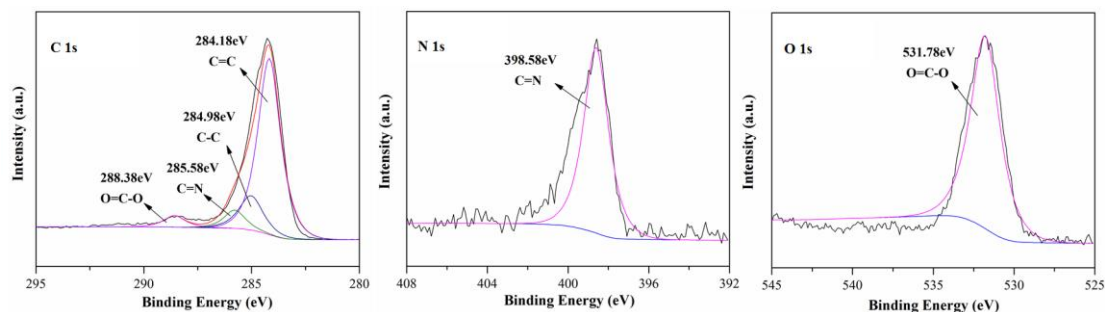

Figure S5. High-resolution XPS spectra of C, N, and O for QCA-COF.

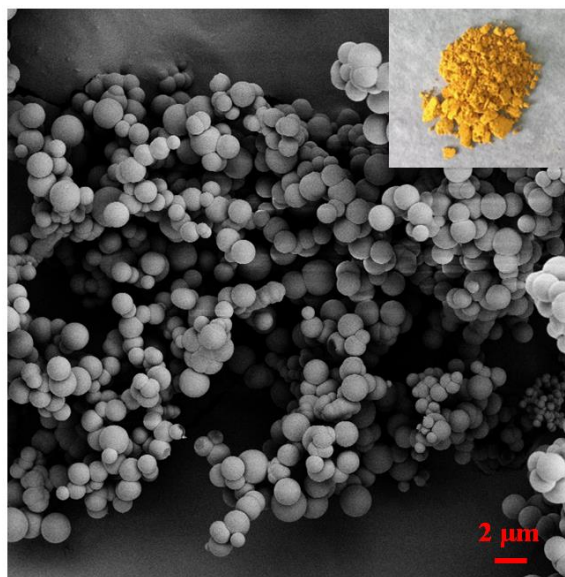

Figure S6. SEM image of QCA-COF, Inset showing its appearance.

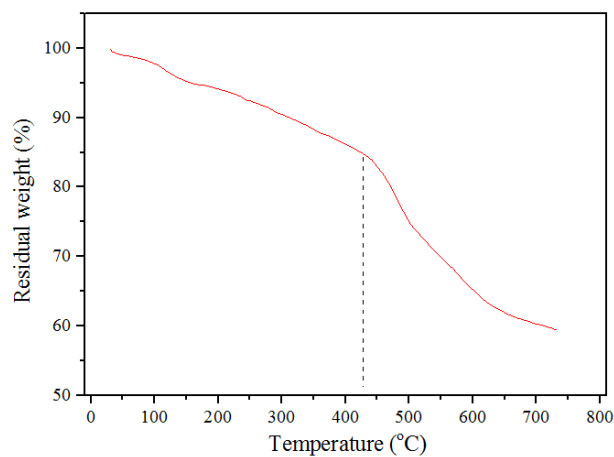

Figure S7. TGA data indicate that QCA-COF is thermally stable up to 420 °C.

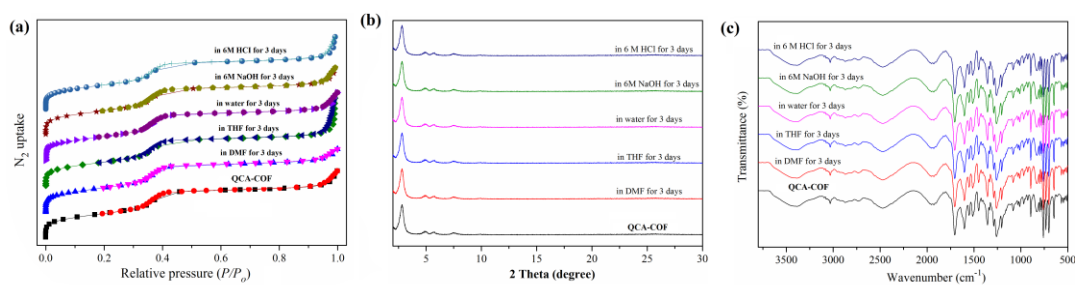

Figure S8. N<sub>2</sub> adsorption-desorption isotherms (a), PXRD patterns (b) and FT-IR spectra (c) for QCA-COF measured after 72 h treating with DMF, THF, water, 6M NaOH, and 6M HCl.

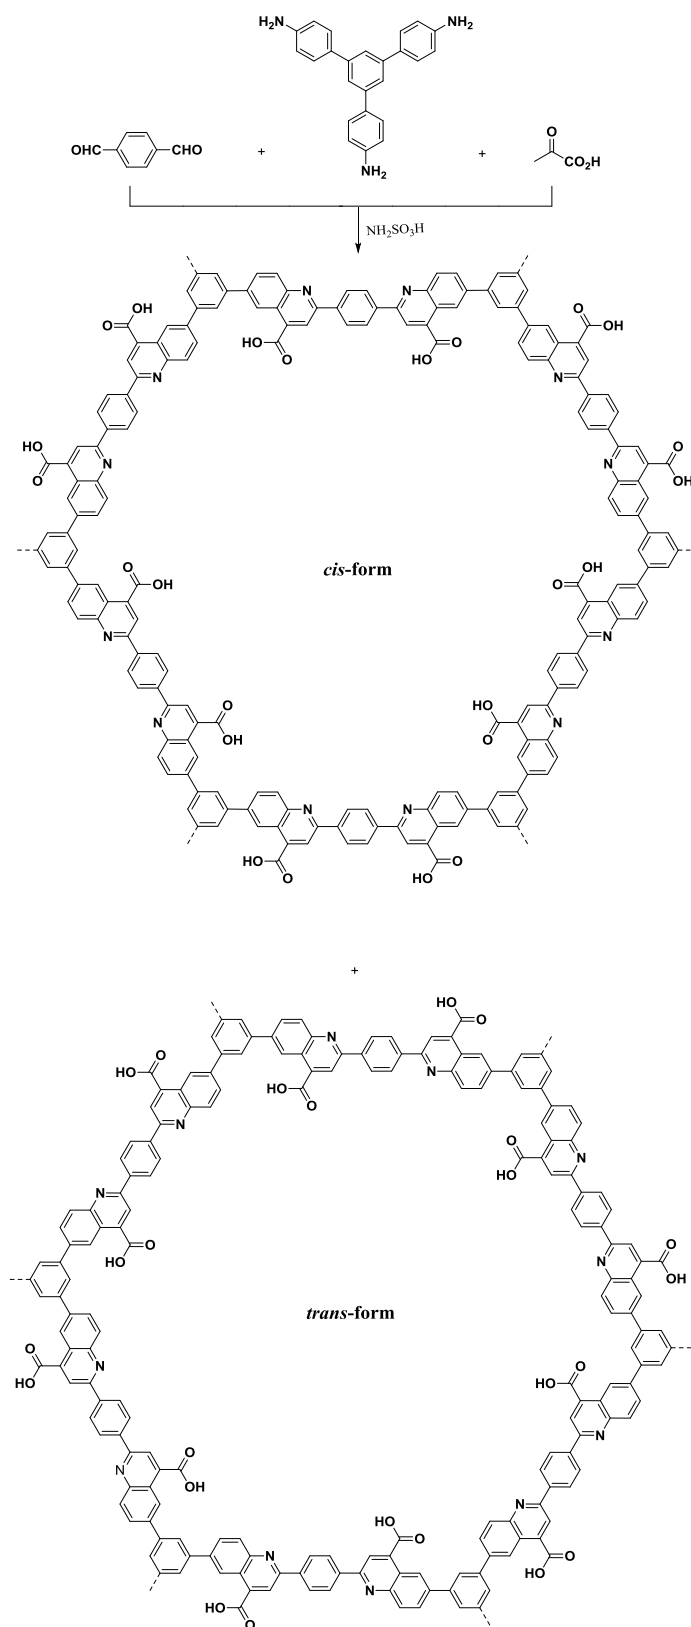

Figure S9. Structures of QCA-COF in its *cis*- and *trans*-form.

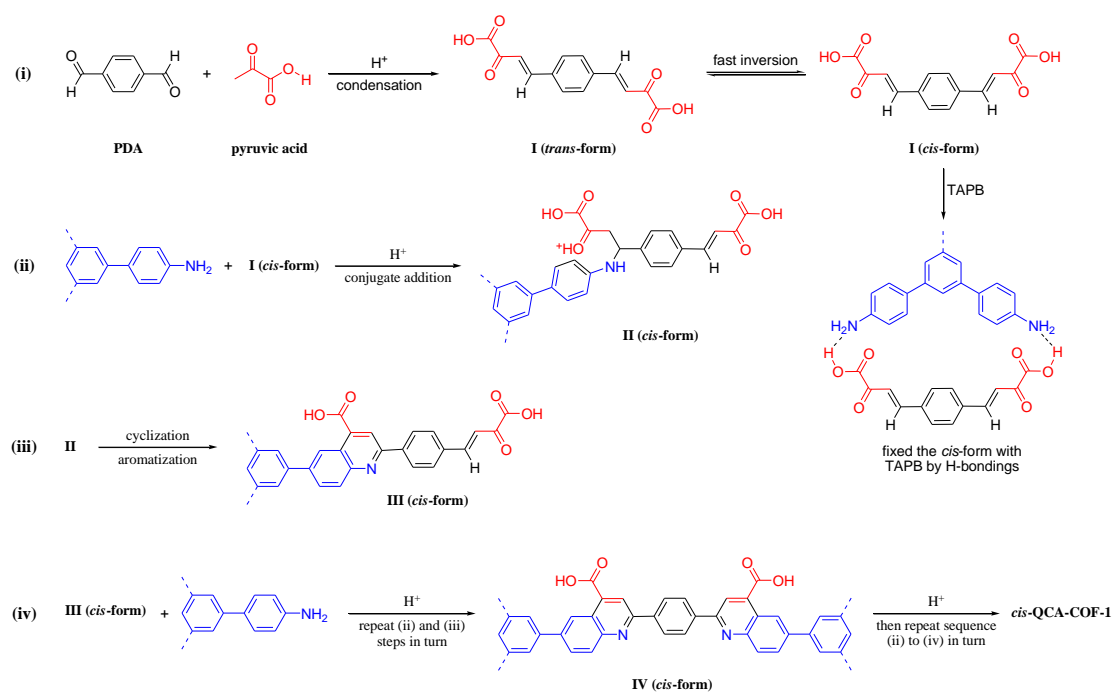

Figure S10. A plausible mechanism proposed for QCA-COF yielded in its *cis*-form.

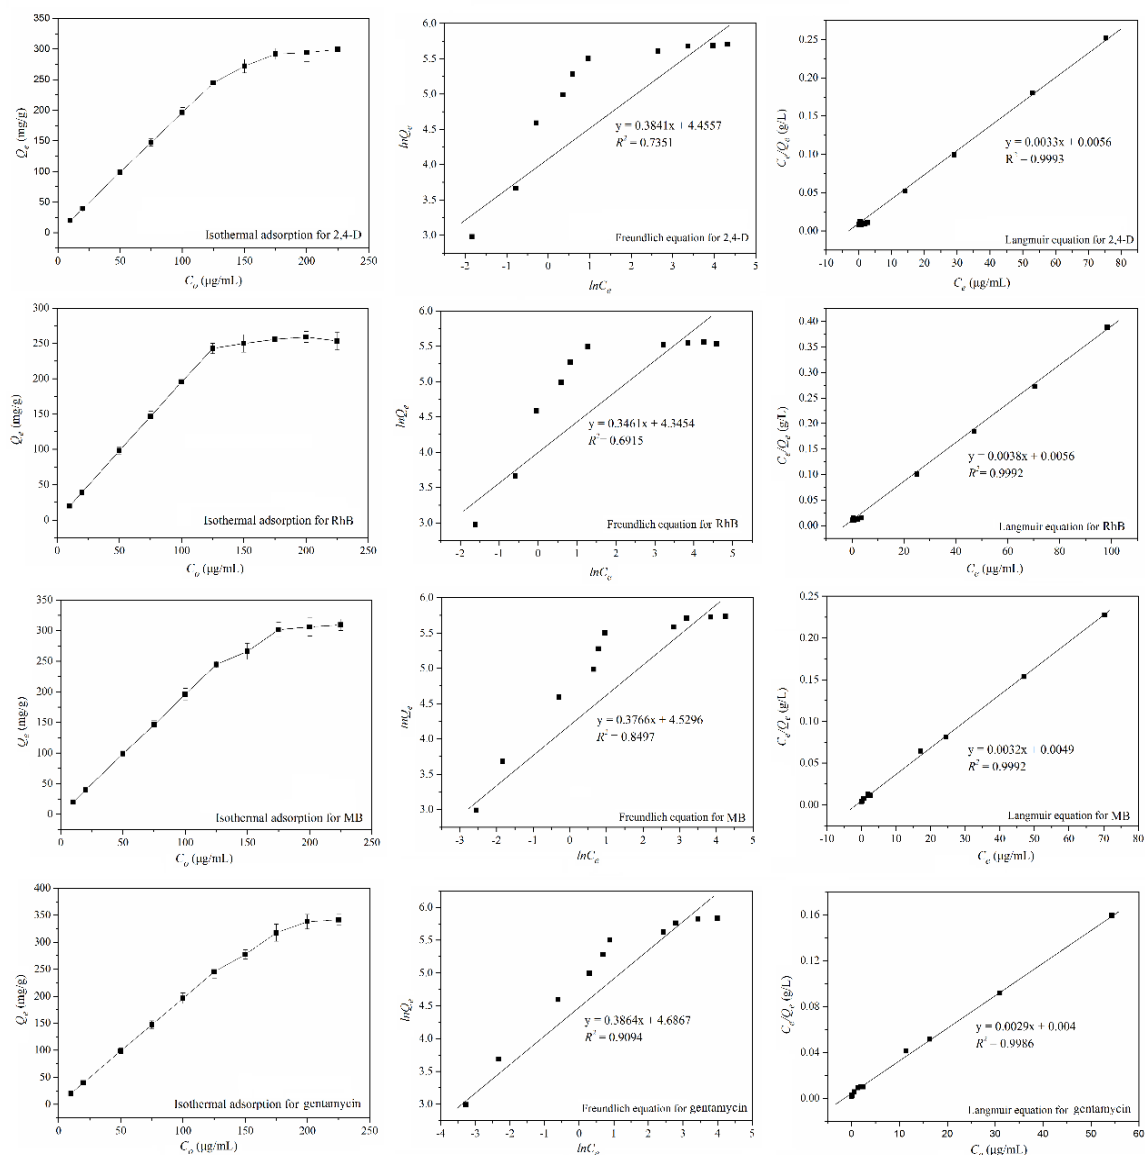

Figure S11. The isothermal adsorption, Langmuir model, and Freundlich model of four contaminants binding by QCA-COF.

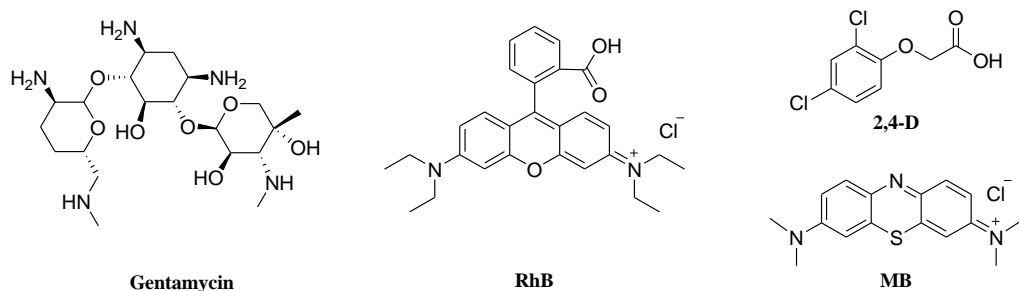

Figure S12. Chemical structures of four water-soluble organic contaminants.

Table S1. The optimized conditions by changing solvents and temperatures.

| Solvent                          | The ratio of solvent | Temp. (°C) | Time (h) | Crystallinity |
|----------------------------------|----------------------|------------|----------|---------------|
| <i>o</i> -DCB                    | -                    | 100        | 8        | Amorphous     |
| <i>n</i> -Butanol                | -                    | 100        | 8        | Poor          |
| <i>o</i> -DCB/ <i>n</i> -Butanol | 1:1                  | 110        | 8        | Amorphous     |
| Dioxane                          | -                    | 100        | 8        | Amorphous     |
| Dioxane/ <i>n</i> -Butanol       | 1:1                  | 100        | 8        | Amorphous     |
| Mesitylene                       | -                    | 100        | 8        | Amorphous     |
| Mesitylene/ <i>n</i> -Butanol    | 1:1                  | 100        | 8        | Amorphous     |
| Dioxane/ <i>n</i> -Butanol       | 1:2                  | 100        | 8        | Poor          |
| Dioxane/ <i>n</i> -Butanol       | 1:3                  | 100        | 8        | Poor          |
| Dioxane/ <i>n</i> -Butanol       | 1:4                  | 100        | 8        | Poor          |
| Dioxane/ <i>n</i> -Butanol       | 1:4                  | 110        | 8        | Crystallinity |
| Dioxane/ <i>n</i> -Butanol       | 1:4                  | 120        | 8        | Poor          |
| Dioxane/ <i>n</i> -Butanol       | 4:1                  | 110        | 8        | Amorphous     |
| Dioxane/ <i>n</i> -Butanol       | 3:1                  | 110        | 8        | Amorphous     |
| Dioxane/ <i>n</i> -Butanol       | 2:1                  | 110        | 8        | Amorphous     |

Table S2. Unit cell parameters and fractional atomic coordinates for QCA-COF in *cis*-form based AA topology after unit cell correction and Pawley refinement.

| Element | Atom Number | Hexagonal, P6. Fractional coordinates of atoms ( $a = 35.78 \text{ \AA}$ , $b = 36.58 \text{ \AA}$ , $c = 3.60 \text{ \AA}$ ; $\alpha = 89.50^\circ$ , $\beta = 90.61^\circ$ , $\gamma = 119.65^\circ$ ) |          |          |
|---------|-------------|----------------------------------------------------------------------------------------------------------------------------------------------------------------------------------------------------------|----------|----------|
| H       | 1           | 3.88474                                                                                                                                                                                                  | -0.25324 | 0.81658  |
| H       | 2           | 3.99024                                                                                                                                                                                                  | -0.12823 | 0.9649   |
| H       | 3           | 3.8706                                                                                                                                                                                                   | -0.14772 | 0.50619  |
| H       | 4           | 4.27838                                                                                                                                                                                                  | 0.43457  | 0.08625  |
| H       | 5           | 4.29276                                                                                                                                                                                                  | 0.55183  | 0.43783  |
| H       | 6           | 4.17143                                                                                                                                                                                                  | 0.45638  | 2.24E-04 |
| H       | 7           | 4.0169                                                                                                                                                                                                   | -0.07568 | 0.55259  |
| H       | 8           | 4.04812                                                                                                                                                                                                  | -0.0011  | 0.40951  |
| H       | 9           | 3.89404                                                                                                                                                                                                  | -0.08351 | 0.74264  |
| H       | 10          | 3.91771                                                                                                                                                                                                  | 0.0511   | 0.33859  |
| H       | 11          | 4.06807                                                                                                                                                                                                  | 0.11522  | 0.39263  |
| H       | 12          | 4.1062                                                                                                                                                                                                   | 0.19105  | 0.30336  |
| H       | 13          | 3.98766                                                                                                                                                                                                  | 0.18631  | -0.02823 |
| H       | 14          | 3.94942                                                                                                                                                                                                  | 0.1106   | 0.04917  |
| H       | 15          | 4.02122                                                                                                                                                                                                  | 0.24814  | 0.33696  |
| H       | 16          | 4.19347                                                                                                                                                                                                  | 0.30383  | -0.23903 |
| H       | 17          | 4.23848                                                                                                                                                                                                  | 0.37975  | -0.24663 |
| H       | 18          | 4.13488                                                                                                                                                                                                  | 0.3928   | 0.20521  |
| H       | 19          | 3.86182                                                                                                                                                                                                  | 0.01161  | 0.73905  |
| H       | 20          | 4.05905                                                                                                                                                                                                  | 0.37964  | 0.67094  |
| H       | 21          | 3.92502                                                                                                                                                                                                  | -0.27005 | 1.16847  |
| H       | 22          | 3.97185                                                                                                                                                                                                  | -0.30086 | 1.15452  |
| H       | 23          | 4.02641                                                                                                                                                                                                  | -0.15492 | 0.71249  |
| H       | 24          | 4.14138                                                                                                                                                                                                  | -0.18522 | 0.54566  |
| H       | 25          | 4.06117                                                                                                                                                                                                  | -0.32795 | 0.89834  |
| H       | 26          | 4.09874                                                                                                                                                                                                  | -0.36764 | 0.84947  |
| H       | 27          | 4.21492                                                                                                                                                                                                  | -0.25341 | 0.55185  |
| H       | 28          | 4.17927                                                                                                                                                                                                  | -0.21387 | 0.62963  |
| H       | 29          | 4.24732                                                                                                                                                                                                  | -0.28792 | 0.70356  |
| H       | 30          | 4.11434                                                                                                                                                                                                  | -0.4644  | 0.56818  |
| H       | 31          | 4.14475                                                                                                                                                                                                  | -0.51007 | 0.46744  |
| H       | 32          | 4.27019                                                                                                                                                                                                  | -0.40071 | 0.32429  |
| H       | 33          | 4.34486                                                                                                                                                                                                  | -0.3306  | 0.78897  |
| H       | 34          | 4.1613                                                                                                                                                                                                   | -0.08336 | 0.44434  |
| H       | 35          | 4.81108                                                                                                                                                                                                  | 0.80123  | 0.80859  |
| H       | 36          | 4.73461                                                                                                                                                                                                  | 0.75626  | 0.68796  |
| H       | 37          | 4.83509                                                                                                                                                                                                  | 0.70249  | 0.45609  |

|   |    |         |           |          |
|---|----|---------|-----------|----------|
| H | 38 | 4.6921  | 0.58908   | 0.16482  |
| H | 39 | 4.62479 | 0.66481   | 0.12064  |
| H | 40 | 4.54681 | 0.6255    | 0.09903  |
| H | 41 | 4.54955 | 0.51511   | 0.50951  |
| H | 42 | 4.62733 | 0.55446   | 0.51723  |
| H | 43 | 4.48287 | 0.48083   | 0.35202  |
| H | 44 | 4.43159 | 0.60819   | 0.13033  |
| H | 45 | 4.35399 | 0.57818   | 0.10415  |
| H | 46 | 4.33754 | 0.45765   | 0.4284   |
| H | 47 | 4.73963 | 0.57159   | 0.46788  |
| H | 48 | 4.34811 | 0.38097   | 0.13102  |
| C | 1  | 3.87124 | -0.20351  | 0.68447  |
| C | 2  | 3.89794 | -0.2197   | 0.79785  |
| C | 3  | 3.94183 | -0.19288  | 0.87784  |
| C | 4  | 3.95783 | -0.1492   | 0.86947  |
| C | 5  | 3.93282 | -0.13223  | 0.72978  |
| C | 6  | 3.8897  | -0.1599   | 0.63407  |
| C | 7  | 4.22037 | 0.43876   | 0.06041  |
| C | 8  | 4.26471 | 0.45473   | 0.12225  |
| C | 9  | 4.29168 | 0.49656   | 0.23384  |
| C | 10 | 4.27305 | 0.52157   | 0.30946  |
| C | 11 | 4.2295  | 0.50762   | 0.22855  |
| C | 12 | 4.20408 | 0.46665   | 0.08823  |
| C | 13 | 3.95245 | -0.08617  | 0.65391  |
| C | 14 | 3.9963  | -0.06186  | 0.56278  |
| C | 15 | 4.01419 | -0.01933  | 0.47301  |
| C | 16 | 3.98825 | -8.05E-04 | 0.45081  |
| C | 17 | 3.94386 | -0.0249   | 0.52109  |
| C | 18 | 3.92696 | -0.06663  | 0.64637  |
| C | 19 | 3.98236 | 0.06025   | 0.32269  |
| C | 20 | 3.93756 | 0.03672   | 0.37343  |
| C | 21 | 3.91785 | -0.00624  | 0.46349  |
| C | 22 | 3.87015 | -0.03166  | 0.46095  |
| C | 23 | 4.00515 | 0.10631   | 0.24109  |
| C | 24 | 4.04995 | 0.13008   | 0.29808  |
| C | 25 | 4.07194 | 0.17362   | 0.24664  |
| C | 26 | 4.04971 | 0.19465   | 0.13972  |
| C | 27 | 4.00536 | 0.17103   | 0.06745  |
| C | 28 | 3.98335 | 0.12736   | 0.11495  |
| C | 29 | 4.07294 | 0.24112   | 0.11508  |
| C | 30 | 4.13841 | 0.3042    | -0.00726 |
| C | 31 | 4.12103 | 0.32915   | 0.1184   |

|   |    |         |          |           |
|---|----|---------|----------|-----------|
| C | 32 | 4.0776  | 0.30853  | 0.24143   |
| C | 33 | 4.05386 | 0.2644   | 0.23287   |
| C | 34 | 4.05556 | 0.33097  | 0.38342   |
| C | 35 | 4.18051 | 0.32307  | -0.13786  |
| C | 36 | 4.20634 | 0.36666  | -0.13756  |
| C | 37 | 4.19081 | 0.39255  | -6.20E-04 |
| C | 38 | 4.14752 | 0.37327  | 0.11367   |
| C | 39 | 3.97177 | -0.21017 | 0.92697   |
| C | 40 | 3.95714 | -0.25131 | 1.05953   |
| C | 41 | 3.98388 | -0.269   | 1.05388   |
| C | 42 | 4.02578 | -0.24603 | 0.91842   |
| C | 43 | 4.04192 | -0.20421 | 0.79319   |
| C | 44 | 4.01471 | -0.18664 | 0.80581   |
| C | 45 | 4.09195 | -0.244   | 0.78048   |
| C | 46 | 4.10942 | -0.20208 | 0.65877   |
| C | 47 | 4.08488 | -0.18177 | 0.6614    |
| C | 48 | 4.11636 | -0.2674  | 0.76231   |
| C | 49 | 4.09494 | -0.31112 | 0.82752   |
| C | 50 | 4.11651 | -0.33407 | 0.79772   |
| C | 51 | 4.16018 | -0.31412 | 0.70002   |
| C | 52 | 4.18173 | -0.27037 | 0.63812   |
| C | 53 | 4.16044 | -0.24735 | 0.67449   |
| C | 54 | 4.18201 | -0.3395  | 0.64912   |
| C | 55 | 4.17523 | -0.40695 | 0.54954   |
| C | 56 | 4.2201  | -0.38903 | 0.50991   |
| C | 57 | 4.24651 | -0.34547 | 0.57607   |
| C | 58 | 4.22707 | -0.32094 | 0.64202   |
| C | 59 | 4.14865 | -0.45047 | 0.52645   |
| C | 60 | 4.16619 | -0.47644 | 0.46063   |
| C | 61 | 4.2105  | -0.45913 | 0.39041   |
| C | 62 | 4.23683 | -0.41504 | 0.40451   |
| C | 63 | 4.2939  | -0.32543 | 0.61374   |
| C | 64 | 4.10586 | -0.13771 | 0.52      |
| C | 65 | 4.82942 | 0.75573  | 0.62921   |
| C | 66 | 4.80028 | 0.77023  | 0.69546   |
| C | 67 | 4.75643 | 0.7445   | 0.63056   |
| C | 68 | 4.74055 | 0.70351  | 0.50332   |
| C | 69 | 4.76881 | 0.68784  | 0.43175   |
| C | 70 | 4.81321 | 0.71427  | 0.49933   |
| C | 71 | 4.67953 | 0.63787  | 0.34674   |
| C | 72 | 4.70619 | 0.62095  | 0.26783   |
| C | 73 | 4.75108 | 0.64573  | 0.30575   |

|   |    |         |          |          |
|---|----|---------|----------|----------|
| C | 74 | 4.63215 | 0.61258  | 0.31481  |
| C | 75 | 4.60852 | 0.63197  | 0.20172  |
| C | 76 | 4.5637  | 0.60929  | 0.1903   |
| C | 77 | 4.54107 | 0.56662  | 0.2972   |
| C | 78 | 4.56502 | 0.54727  | 0.41177  |
| C | 79 | 4.60999 | 0.56994  | 0.41776  |
| C | 80 | 4.49303 | 0.54405  | 0.29874  |
| C | 81 | 4.77803 | 0.62675  | 0.20565  |
| C | 82 | 4.42932 | 0.54934  | 0.2497   |
| C | 83 | 4.40284 | 0.50575  | 0.31032  |
| C | 84 | 4.42268 | 0.48049  | 0.3415   |
| C | 85 | 4.4679  | 0.5002   | 0.33925  |
| C | 86 | 4.39809 | 0.43375  | 0.3422   |
| C | 87 | 4.41117 | 0.57492  | 0.18543  |
| C | 88 | 4.36672 | 0.5577   | 0.1779   |
| C | 89 | 4.33937 | 0.51484  | 0.25778  |
| C | 90 | 4.35803 | 0.48952  | 0.3374   |
| N | 1  | 4.0059  | 0.04044  | 0.35815  |
| N | 2  | 4.11439 | 0.26164  | -0.00129 |
| N | 3  | 4.05081 | -0.26431 | 0.90676  |
| N | 4  | 4.15775 | -0.382   | 0.61214  |
| N | 5  | 4.6975  | 0.67851  | 0.45768  |
| N | 6  | 4.47269 | 0.56678  | 0.24942  |
| O | 1  | 3.8526  | -0.06671 | 0.32352  |
| O | 2  | 3.84467 | -0.01613 | 0.6048   |
| O | 3  | 4.07792 | 0.36772  | 0.59053  |
| O | 4  | 4.01701 | 0.31621  | 0.32971  |
| O | 5  | 4.31672 | -0.28859 | 0.5268   |
| O | 6  | 4.31238 | -0.34811 | 0.76543  |
| O | 7  | 4.08535 | -0.12445 | 0.34916  |
| O | 8  | 4.15019 | -0.11184 | 0.567    |
| O | 9  | 4.76582 | 0.58529  | 0.30204  |
| O | 10 | 4.811   | 0.64709  | 0.02969  |
| O | 11 | 4.41291 | 0.41395  | 0.49805  |
| O | 12 | 4.35919 | 0.41225  | 0.1487   |

Table S3. UHPLC gradient conditions of 2,4-D, MB, and RhB. UHPLC gradient conditions, percentage of: (A) 0.1% formic acid solution in water; (B) ACN.

| Time<br>(min) | Flow<br>(mL/min) | A% | B% |
|---------------|------------------|----|----|
| 0.0           | 0.3              | 80 | 20 |
| 0.2           | 0.3              | 80 | 20 |
| 1.5           | 0.3              | 5  | 95 |
| 3.0           | 0.3              | 5  | 95 |
| 4.0           | 0.3              | 80 | 20 |
| 5.0           | 0.3              | 80 | 20 |

Table S4. UHPLC gradient conditions of gentamicin. UHPLC gradient conditions, percentage of: (B) ACN; (C) 200 mM ammonium formate solution in water.

| Time<br>(min) | Flow<br>(mL/min) | B% | C% |
|---------------|------------------|----|----|
| 0.0           | 0.3              | 20 | 80 |
| 0.2           | 0.3              | 20 | 80 |
| 1.0           | 0.3              | 80 | 20 |
| 1.5           | 0.3              | 80 | 20 |
| 2.0           | 0.3              | 20 | 80 |

Table S5. Mass conditions.

| Compounds  | Parent ion<br>(m/z) | Daughter ion<br>(m/z) | Dwell | Cone<br>(V) | Collision<br>(eV) | Ionization<br>mode |
|------------|---------------------|-----------------------|-------|-------------|-------------------|--------------------|
| Gentamicin | 478.4               | 156.7*/321.8          | 0.163 | 55          | 22/14             | PI                 |
| 2,4-D      | 218.7               | 160.9*/125.4          | 0.163 | 18          | 8/10              | NI                 |
| MB         | 284.0               | 268.0*/240.0          | 0.163 | 30          | 15/20             | PI                 |
| RhB        | 443.0               | 399.0*/355.0          | 0.163 | 60          | 50/46             | PI                 |

Table S6. The linearity of UHPLC-MS/MS method for 2,4-D, MB, RhB, and gentamicin.

| Analytes   | Calibration plot    | Linear range (ng/mL) | $R^2$  | LOQ <sup>a</sup> (ng/mL) |
|------------|---------------------|----------------------|--------|--------------------------|
| 2,4-D      | $y=1771.92x+0.6786$ | 0.05-200.0           | 0.9924 | 0.01                     |
| MB         | $y=322.90x-192.74$  | 0.1-200.0            | 0.9974 | 0.1                      |
| RhB        | $y=41010.1x-2040.6$ | 0.05-200.0           | 0.9940 | 0.01                     |
| Gentamicin | $y=158.25x-155.84$  | 0.1-200.0            | 0.9918 | 0.1                      |

<sup>a</sup> Limit of quantitation. S/N ratio = 10.
